# Supplementary material
Source: ML conference proceedings conference paper supplement (https://openreview.net/forum?id=V4hqq2NGTW)
Supplement: supplementary_material [file attachment]

---

# Perceptual Kalman Filters: Online State Estimation under a Perfect Perceptual-Quality Constraint - Supplementary Material

---

In App. A we provide a detailed theoretical background on the Kalman Filter, its properties and recursive calculation. In App. B we prove that under our perfect perceptual filtering setting, there exists a *linear* optimal filter (Thm. 4.1). In App. C we discuss a direct, non-recursive method for optimizing perceptual filter coefficients. In App. D we present the derivation of the Lyapunov equation (17) for the error of perceptual filters. In App. E we derive the recursive expression for the filter given in (18). In App. F we find a closed-form solution for PKF coefficients by proving Theorem 4.3. In this appendix, we also give some brief overview on the extremal problem of finding a minimal distance between distributions. App.G contains a discussion about stationary perceptual Kalman filters in the steady-state regime. We summarize all definitions and notations in App. H. Finally, in App.I we give full details for all numerical demonstrations, and present additional empirical and visual results. More results are provided in the supplementary video.

## A The Kalman Filter algorithm

In this Section we supply a detailed reminder of the Kalman filter Algorithm. The celebrated Kalman filter [11] assumes a state  $x_k \in \mathbb{R}^{n_x}$ , where dynamics are modeled as deterministic linear functions perturbed by a Gaussian noise, and observations  $y_k \in \mathbb{R}^{n_y}$  are linear functions of  $x_k$  with an additive noise

$$x_k = A_k x_{k-1} + q_k, \quad q_k \sim \mathcal{N}(0, Q_k), \quad k = 1, \dots, T, \quad (31)$$

$$y_k = C_k x_k + r_k, \quad r_k \sim \mathcal{N}(0, R_k), \quad k = 0, \dots, T. \quad (32)$$

The noise terms  $q_k$  and  $r_k$  are independent white Gaussian processes with zero mean and covariances  $Q_k, R_k$ , respectively.  $x_0$  is assumed to have a zero-mean Gaussian distribution with covariance  $P_0$ , independent of  $q_1, r_0$ . For convenience, we will sometimes refer to  $P_0$  as  $Q_0$ . The matrices  $A_k, C_k, Q_k, R_k$  and  $P_0$  are system parameters with appropriate dimensions, and assumed to be known. Considering the MSE distortion, we denote

$$\hat{x}_{k|s} \triangleq \underset{\hat{x}}{\operatorname{argmin}} \mathbb{E} [\|x_k - \hat{x}\|^2 | y_0, \dots, y_s], \quad (33)$$

namely the optimal MSE estimator of the state at time  $k$ , given measurements up to time  $s$ . Under the assumptions mentioned above, Kalman filters produce the mean state estimate  $\hat{x}_{k|k}$ , an MSE-optimal estimator of  $x_k$  given the observations up to time  $k$ . The *Kalman optimal state*  $\hat{x}_k^* \equiv \hat{x}_{k|k}$  is given by the recurrence

$$\hat{x}_k^* = A_k \hat{x}_{k-1}^* + K_k \mathcal{I}_k, \quad (34)$$

where  $K_k$  is the *optimal Kalman gain* [11], given explicitly in Algorithm 2.

The vector  $\mathcal{I}_k$  is the *innovation* process,

$$\mathcal{I}_k = y_k - C_k \hat{x}_{k|k-1}, \quad (35)$$

describing the contribution of the new observation  $y_k$  over the optimal prediction based on previous observations. Since we are in the Linear-Gaussian setup, we have that the innovation state  $\mathcal{I}_k$  is orthogonal to the measurements  $y_0, \dots, y_{k-1}$ , guaranteeing the MSE optimality of the estimation. The calculation of Kalman state is summarized in Algorithm 2.

---

**Algorithm 2** Kalman Filter

---

**initialize:**  $\hat{x}_0^* = K_0 y_0 = P_0 C_0^\top \Sigma_{Y_0}^{-1} y_0$ ,  $P_{0|0} = P_0 - P_0 C_0^\top \Sigma_{Y_0}^{-1} C_0 P_0$ ,  $\mathcal{I}_0 = y_0$ ,  $S_0 = C_0 P_0 C_0^\top + R_0$ .  
**for**  $k = 1$  to  $T$  **do**  
    calculate prior:  $\hat{x}_{k|k-1} = A_k \hat{x}_{k-1|k-1}$ ,  $P_{k|k-1} = A_k P_{k-1|k-1} A_k^\top + Q_k$   
    calculate Innovation:  $\mathcal{I}_k = y_k - C_k \hat{x}_{k|k-1}$ ,  $S_k = C_k P_{k|k-1} C_k^\top + R_k$   
    Kalman gain:  $K_k = P_{k|k-1} C_k^\top S_k^{-1}$   
    update (posterior):  $\hat{x}_k^* = \hat{x}_{k|k} = \hat{x}_{k|k-1} + K_k \mathcal{I}_k$ ,  $P_{k|k} = (I - K_k C_k) P_{k|k-1}$   
**end for**

---

## B Optimality of linear filters (proof of Thm. 4.1)

In this section we show that under a family of optimality criteria (5) and perfect-perceptual quality and causality constraints (6-7), linear filters of the form (14) are optimal. We start with the following.

**Theorem B.1.** *Let  $Y_0^T = (y_0, \dots, y_T)$  be the set of measurements (4), and let  $(J_0^T, Y_0^T)$  be a joint distribution s.t.  $J_k$  is independent of  $y_{k+n}$  given  $Y_0^k$  for all  $k \in [0, T]$  and  $n \geq 1$ . Then,*

$$\mathbb{E} [J_k \mathcal{I}_{k+n}^\top] = 0. \quad (36)$$

*Proof.* Denote  $\hat{J}_k = \mathbb{E} [J_k | \mathcal{I}_0^k]$ . We can write the measurements as a linear function of the innovations,  $y_k = \sum_{t=0}^k H_{k,t} \mathcal{I}_t$ . We have

$$\hat{y}_{k+n}^{k+n-1} \triangleq \mathbb{E} [y_{k+n} | Y_0^{k+n-1}] = \mathbb{E} [y_{k+n} | \mathcal{I}_0^{k+n-1}] = \sum_{t=0}^{k+n-1} H_{k+n,t} \mathcal{I}_t, \quad (37)$$

and

$$\hat{y}_{k+n}^k \triangleq \mathbb{E} [y_{k+n} | Y_0^k] = \mathbb{E} [y_{k+n} | \mathcal{I}_0^k] = \sum_{t=0}^k H_{k+n,t} \mathcal{I}_t = \mathbb{E} [\hat{y}_{k+n}^{k+n-1} | \mathcal{I}_0^k]. \quad (38)$$

For any  $k$  and  $n = 1$ ,  $\mathcal{I}_{k+1} = y_{k+1} - \hat{y}_{k+1}^k$ , and therefore

$$\mathbb{E} [J_k \mathcal{I}_{k+1}^\top] = \mathbb{E} \left[ J_k [y_{k+1} - \hat{y}_{k+1}^k]^\top | \mathcal{I}_0^k \right] = \mathbb{E} [\hat{J}_k [\hat{y}_{k+1}^k]^\top - \mathbb{E} [J_k | \mathcal{I}_0^k] [\hat{y}_{k+1}^k]^\top] = 0. \quad (39)$$

This is due to the facts that  $J_k$  and  $y_{k+1}$  are independent given the condition, and that  $\hat{y}_{k+1}^k$  is a deterministic function of  $\mathcal{I}_0^k$ .

Now, assume we know that  $\mathbb{E} [J_k \mathcal{I}_t^\top] = 0$  for  $k+1 \leq t \leq k+n-1$ . We can write

$$\begin{aligned} \mathbb{E} [J_k \mathcal{I}_{k+n}^\top] &= \mathbb{E} \left[ \mathbb{E} [J_k [y_{k+n} - \hat{y}_{k+n}^{k+n-1}]^\top | \mathcal{I}_0^k] \right] \\ &= \mathbb{E} \left[ \hat{J}_k [\hat{y}_{k+n}^k]^\top - \mathbb{E} \left[ J_k \sum_{t=0}^{k+n-1} \mathcal{I}_t^\top H_{k+n,t}^\top | \mathcal{I}_0^k \right] \right] \\ &= \mathbb{E} \left[ \hat{J}_k [\hat{y}_{k+n}^k]^\top - \mathbb{E} \left[ J_k \sum_{t=0}^k \mathcal{I}_t^\top H_{k+n,t}^\top | \mathcal{I}_0^k \right] - \mathbb{E} \left[ J_k \sum_{t=k+1}^{k+n-1} \mathcal{I}_t^\top H_{k+n,t}^\top | \mathcal{I}_0^k \right] \right] \\ &= \mathbb{E} \left[ \hat{J}_k [\hat{y}_{k+n}^k]^\top - \hat{J}_k [\hat{y}_{k+n}^k]^\top - \sum_{t=k+1}^{k+n-1} \mathbb{E} [J_k \mathcal{I}_t^\top | \mathcal{I}_0^k] H_{k+n,t}^\top \right] \\ &= - \sum_{t=k+1}^{k+n-1} \mathbb{E} [J_k \mathcal{I}_t^\top] H_{k+n,t}^\top \\ &= 0. \end{aligned} \quad (40)$$

□

We now show that for every filter which is feasible under (6) and (7), one can find a linear filter, jointly Gaussian with the measurement set, attaining the same cost objective.

**Theorem B.2.** *Let  $Y_0^T = (y_0, \dots, y_T)$  be the set of measurements (4), and let  $\mathcal{J}_0^T = (\mathcal{J}_0, \dots, \mathcal{J}_T)$  be jointly distributed with  $Y_0^T$  such that:*

- (i)  $\mathcal{J}_0^T \sim \mathcal{N}(0, \text{diag}\{P_0, Q_1, \dots, Q_T\})$ .
- (ii)  $\mathcal{J}_k$  is independent of  $y_{k+n}$  given  $Y_0^k$  for all  $k \in [0, T]$  and  $n \geq 1$ .
- (iii)  $\sum_{k=0}^T \alpha_k \mathbb{E} [\|x_k - \chi_k\|^2] = \mathcal{C}$ , where  $\chi_k$  is the process given by  $\chi_k = A_k \chi_{k-1} + \mathcal{J}_k$  with  $\chi_0 = \mathcal{J}_0$ .

Then, there exists a joint Gaussian distribution  $(J_0^T, Y_0^T)$  in which (i) and (ii) hold, and the estimator given by

$$\hat{x}_k = A_k \hat{x}_{k-1} + J_k, \quad \hat{x}_0 = J_0 \quad (41)$$

achieves the same cost (iii), namely  $\sum_{k=0}^T \alpha_k \mathbb{E} [\|x_k - \hat{x}_k\|^2] = C$ .

Furthermore, we can write

$$J_k = \pi_k \mathcal{I}_k + \phi_k v_k + w_k, \quad (42)$$

where

$$v_k = \mathcal{I}_0^{k-1} - \mathbb{E} [\mathcal{I}_0^{k-1} | J_0^{k-1}] \quad (43)$$

and  $w_k$  is a white Gaussian noise, independent of  $Y_0^T$  and  $J_0^{k-1}$ .

*Proof.* Let  $(J_0^T, Y_0^T)$  be the Gaussian distribution defined by the moments of  $(\mathcal{J}_0^T, Y_0^T)$  up to second order. We observe that from Theorem B.1 above,  $J_k$  is independent of all future innovations  $\mathcal{I}_{k+n}$ , namely it is based only on measurements up to time  $k$ . Using the notions of Theorem B.1's proof,

$$\begin{aligned} \mathbb{E} \left[ (J_k - \hat{J}_k)(y_{k+n} - \hat{y}_{k+n}^k)^\top | Y_0^k \right] &= \mathbb{E} \left[ (J_k - \hat{J}_k) \sum_{t=k+1}^{k+n} \mathcal{I}_t^\top H_{k+n,t}^\top | \mathcal{I}_0^k \right] \\ &= \sum_{t=k+1}^{k+n} \left[ \mathbb{E} [J_k \mathcal{I}_t^\top | \mathcal{I}_0^k] - \hat{J}_k \mathbb{E} [\mathcal{I}_t^\top | \mathcal{I}_0^k] \right] H_{k+n,t}^\top \\ &= \sum_{t=k+1}^{k+n} \mathbb{E} \left[ \mathbb{E} [J_k \mathcal{I}_t^\top | \mathcal{I}_t, \mathcal{I}_0^k] | \mathcal{I}_0^k \right] H_{k+n,t}^\top \\ &= \sum_{t=k+1}^{k+n} \mathbb{E} \left[ \mathbb{E} [J_k | \mathcal{I}_t, \mathcal{I}_0^k] \mathcal{I}_t^\top | \mathcal{I}_0^k \right] H_{k+n,t}^\top \\ &= \sum_{t=k+1}^{k+n} \mathbb{E} \left[ \mathbb{E} [J_k | \mathcal{I}_0^k] \mathcal{I}_t^\top | \mathcal{I}_0^k \right] H_{k+n,t}^\top \\ &= \sum_{t=k+1}^{k+n} \mathbb{E} [J_k | \mathcal{I}_0^k] \mathbb{E} [\mathcal{I}_t^\top | \mathcal{I}_0^k] H_{k+n,t}^\top \\ &= 0. \end{aligned} \quad (44)$$

This means that  $J_k$  and  $y_{k+n}$  are independent given  $Y_0^k$ , which proves (ii).

From (17) we see that the cost functional depends only on the second order statistics of  $(\mathcal{J}_0^T, \mathcal{I}_0^T)$  which are identical to those of  $(J_0^T, \mathcal{I}_0^T)$ , hence (iii) holds:

$$\sum_{k=0}^T \alpha_k \mathbb{E} [\|x_k - \hat{x}_k\|^2] = \sum_{k=0}^T \alpha_k \mathbb{E} [\|x_k - \chi_k\|^2] = C. \quad (45)$$

To prove (42), we now write

$$J_k = \varepsilon_k + w_k, \quad (46)$$

where  $\varepsilon_k = \mathbb{E} [J_k | Y_0^T, J_0^{k-1}]$ , and  $w_k = J_k - \mathbb{E} [J_k | Y_0^T, J_0^{k-1}]$  is independent of  $Y_0^T$  and  $J_0^{k-1}$ . Now, since both  $J_k$  and  $J_0^{k-1}$  are independent of  $\mathcal{I}_{k+1}^T$ ,

$$\varepsilon_k = \mathbb{E} [J_k | Y_0^T, J_0^{k-1}] = \mathbb{E} [J_k | \mathcal{I}_0^k, J_0^{k-1}] = \sum_{t=0}^k \phi_{k,t} \mathcal{I}_t + \sum_{t=0}^{k-1} \psi_{k,t} J_t. \quad (47)$$

$J_k$  is independent of  $J_0^{k-1}$ , thus

$$\mathbb{E} [J_k | J_0^{k-1}] = \mathbb{E} [\mathbb{E} [J_k | \mathcal{I}_0^T, J_0^{k-1}] | J_0^{k-1}] = 0. \quad (48)$$

Conditioning both sides of (47) on  $J_0^{k-1}$  and taking expectations,

$$0 = \sum_{t=0}^k \phi_{k,t} \mathbb{E} [\mathcal{I}_t | J_0^{k-1}] + \sum_{t=0}^{k-1} \psi_{k,t} J_t. \quad (49)$$

Note that  $\mathbb{E} [\mathcal{I}_k | J_0^{k-1}] = 0$ , which together with (49) implies

$$\varepsilon_k = \phi_{k,k} \mathcal{I}_k + \sum_{t=0}^{k-1} \phi_{k,t} [\mathcal{I}_t - \mathbb{E} [\mathcal{I}_t | J_0^{k-1}]] = \pi_k \mathcal{I}_k + \phi_k v_k. \quad (50)$$

Now, all we have left to show is that  $w_k$  is a white sequence. Since  $w_{k+n}$  ( $n \geq 1$ ) is independent of  $J_0^k$  and  $\mathcal{I}_0^T$  (which also constitute  $v_k$ ), it is easy to obtain

$$\mathbb{E} [w_{k+n} w_k^\top] = \mathbb{E} [w_{k+n} [J_k - \pi_k \mathcal{I}_k - \phi_k v_k]^\top] = 0. \quad (51)$$

□

**Corollary B.3.** *Given a cost objective of the form  $\mathcal{C} = \sum_{k=0}^T \alpha_k \mathbb{E} [\|x_k - \hat{x}_k\|^2]$ , there exists a linear filter of the form*

$$J_k = \pi_k \mathcal{I}_k + \phi_k v_k + w_k, \quad (52)$$

such that

$$\hat{x}_0 = J_0 \quad (53)$$

$$\hat{x}_k = A_k \hat{x}_{k-1} + J_k, \quad k = 1, \dots, T \quad (54)$$

is an optimal estimator under the perfect perceptual quality and causality constraints (6-7).

*Proof.* Under the perfect perceptual quality constraint, an estimate sequence  $\chi_k$  must satisfy that

$$\mathcal{J}_k = \chi_k - A_k \chi_{k-1} \quad (55)$$

is a white Gaussian process with covariances  $Q_k$ . If, in addition,  $\chi_k$  satisfies the causality condition (6), so does  $\mathcal{J}_k$ . We conclude from Theorem B.2 that there exists a causal linear filter  $J_k$  that achieves the same expected objective  $\mathcal{C}$  as  $\chi_k$ .

Now, note again that from (17), for perfect-perceptual quality causal filters, the objective  $\mathcal{C}$  is a continuous function of the covariance matrix

$$\mathbb{E} [\mathcal{J}_0^T (\mathcal{I}_0^T)^\top] = \begin{bmatrix} \text{diag}\{P_0, Q_1, \dots, Q_T\} & L \\ L^\top & \text{diag}\{S_0, S_1, \dots, S_T\} \end{bmatrix} \succeq 0, \quad (56)$$

where, due to the causality demand,  $L$  is a quasi lower triangular matrix. The set of such feasible matrices is non-empty, closed (since it is the intersection of the closed cone of PSD matrices with a finite set of hyperplanes) and bounded. Hence,  $\mathcal{C}$  attains a minimal value on some joint distribution  $p_{\mathcal{J}_0^T, \mathcal{I}_0^T}$ , which can be chosen to be joint-Gaussian as we have seen.

□

## C A Direct optimization approach to perfect-perceptual quality filtering

For the sake of completeness, we now discuss a method for optimizing non-recursive perfect-perceptual quality filter coefficients. This approach leads to convex programs. However, as we will see next, it might become impractical for large configurations.

Let  $J = J_0^T \sim \mathcal{N}(0, Q)$ , where  $Q = \text{diag} \{ \{Q_k\}_{k=0}^T \}$ , be a causal function of the measurements,  $J = \Phi \mathcal{I} + W$ , where  $\mathcal{I} = \mathcal{I}_0^T$  is the innovation process with covariance  $S = \text{diag} \{S_k\}$  and  $W$  is an independent noise. Now,  $\hat{X} = \hat{X}_0^T = A_J J$  is the filter's output, where

$$A_J = \begin{bmatrix} I & 0 & \dots & 0 \\ A_1 & I & \dots & 0 \\ \vdots & \vdots & \ddots & \vdots \\ \prod_{k=0}^{T-1} A_{T-k} & \prod_{k=1}^{T-1} A_{T-k} & \dots & I \end{bmatrix}. \quad (57)$$

Recall  $X^*$  is the Kalman filter output given by  $X^* = A_J K \mathcal{I}$ , where  $K = \text{diag} \{K_k\}$ . Let  $\mathcal{W} = \text{diag} \{ \alpha_k \} \otimes I_{n_x}$  be a weighting matrix. The objective (5) is now given by

$$\begin{aligned} \mathcal{C}(\hat{X}) &= \mathbb{E} \left[ (\hat{X} - X^*)^\top \mathcal{W} (\hat{X} - X^*) \right] \\ &= \text{Tr} \left\{ \mathcal{W} \mathbb{E} [\hat{X} \hat{X}^\top] + \mathcal{W} \mathbb{E} [X^* X^{*\top}] - 2 \mathcal{W} \mathbb{E} [\hat{X} X^{*\top}] \right\}. \end{aligned} \quad (58)$$

Hence, we have to maximize

$$\begin{aligned} \mathcal{C}(\Phi) &= 2 \text{Tr} \left\{ \mathcal{W} \mathbb{E} [\hat{X} X^{*\top}] \right\} \\ &= 2 \text{Tr} \left\{ \mathcal{W} A_J \Phi S K^\top A_J^\top \right\} \\ &= 2 \text{Tr} \left\{ (\Phi S) K^\top A_J^\top \mathcal{W} A_J \right\} \\ &= 2 \text{Tr} \left\{ \Phi S K^\top B \right\}, \end{aligned} \quad (59)$$

where  $B \triangleq A_J^\top \mathcal{W} A_J$ . This is subject to the perfect perceptual-quality constraint

$$Q - \Phi S \Phi^\top \succeq 0, \text{ or equivalently } \begin{bmatrix} Q & \Phi S \\ S \Phi^\top & S \end{bmatrix} \succeq 0, \quad (60)$$

where  $\Phi$  is a lower quasi-triangular matrix (causality constraint)

$$\Phi = \begin{bmatrix} \Phi_{0,0} & 0 & \dots & 0 \\ \Phi_{1,0} & \Phi_{1,1} & \dots & 0 \\ \vdots & \vdots & \ddots & \vdots \\ \Phi_{T,0} & \Phi_{T,1} & \dots & \Phi_{T,T} \end{bmatrix}. \quad (61)$$

Again, under this formulation,

$$J = \Phi \mathcal{I} + W, \quad (62)$$

where  $W \sim \mathcal{N}(0, Q - \Phi S \Phi^\top)$  is a Gaussian noise independent of  $\mathcal{I}$ . Note that  $W_0^T$  might not be a white sequence in this case, since its covariance might not be a block-diagonal matrix. As a result, the noise sequence has to be sampled dependently. Also note that this problem possesses the same memory complexity as (14). To conclude, this method leads to convex, but large optimization programs, and is impractical for high dimensional settings or long temporal sequences.

## D Derivation of eq. (17)

Recall  $\hat{x}_k^*$  is the optimal Kalman state at time  $k$ , achieving MSE given by

$$d_k^* = \mathbb{E} [\|\hat{x}_k^* - x_k\|^2] = \text{Tr} \{P_{k|k}\}. \quad (63)$$

$P_{k|k}$  is the error covariance, given explicitly in Algorithm 2. By the orthogonality principle, for any estimator  $\hat{x}_k$  based on the measurements  $y_0, \dots, y_k$  we have

$$\mathbb{E} [\|x_k - \hat{x}_k\|^2] = \mathbb{E} [\|x_k - \hat{x}_k^*\|^2] + \mathbb{E} [\|\hat{x}_k^* - \hat{x}_k\|^2] = d_k^* + \mathbb{E} [\|\hat{x}_k - \hat{x}_k^*\|^2]. \quad (64)$$

Now, consider an estimator  $\hat{x}_k$  of the form (12), and recall

$$D_k \triangleq \mathbb{E} [\hat{x}_k^* - \hat{x}_k] [\hat{x}_k^* - \hat{x}_k]^\top. \quad (65)$$

Since we choose  $J_k \sim \mathcal{N}(0, Q_k)$  to be independent of  $\hat{x}_{k-1}$  and  $\mathcal{I}_k$  is independent of  $\hat{x}_{k-1}$  and  $\hat{x}_{k-1}^*$ , we write

$$\begin{aligned} D_k &= \mathbb{E} [\hat{x}_k^* - \hat{x}_k] [\hat{x}_k^* - \hat{x}_k]^\top \\ &= \mathbb{E} [A_k \hat{x}_{k-1} - A_k \hat{x}_{k-1}^* + J_k - K_k \mathcal{I}_k] [A_k \hat{x}_{k-1} - A_k \hat{x}_{k-1}^* + J_k - K_k \mathcal{I}_k]^\top \\ &= A_k \mathbb{E} [\hat{x}_{k-1}^* - \hat{x}_{k-1}] [\hat{x}_{k-1}^* - \hat{x}_{k-1}]^\top A_k^\top + \mathbb{E} [J_k J_k^\top] + K_k \mathbb{E} [\mathcal{I}_k \mathcal{I}_k^\top] K_k^\top \\ &\quad - \mathbb{E} [J_k [A_k \hat{x}_{k-1}^* + K_k \mathcal{I}_k]^\top] - \mathbb{E} [[A_k \hat{x}_{k-1}^* + K_k \mathcal{I}_k] J_k^\top] \\ &= A_k D_{k-1} A_k^\top + K_k S_k K_k^\top + Q_k \\ &\quad - \mathbb{E} [J_k \mathcal{I}_k^\top] K_k^\top - K_k \mathbb{E} [\mathcal{I}_k J_k^\top] - A_k \mathbb{E} [\hat{x}_{k-1}^* J_k^\top] - \mathbb{E} [J_k \hat{x}_{k-1}^{*\top}] A_k^\top. \end{aligned} \quad (66)$$

## E Derivation of recursive perfect-perceptual quality filters

We now derive the recursive expression (21)-(22) for the filter given in (18),

$$\hat{x}_k = A_k \hat{x}_{k-1} + J_k, \quad (67)$$

$$J_k = \Phi_k A_k \Upsilon_k + \Pi_k K_k \mathcal{I}_k + w_k, \quad w_k \sim \mathcal{N}(0, \Sigma_{w_k}), \quad (68)$$

defined by the coefficients  $\{\Pi_k, \Phi_k\}_{t=0}^T$  fulfilling the constraints (20). Recall

$$\Upsilon_k \triangleq \hat{x}_{k-1}^* - \mathbb{E}[\hat{x}_{k-1}^* | \hat{x}_0, \dots, \hat{x}_{k-1}] = \hat{x}_{k-1}^* - \mathbb{E}[\hat{x}_{k-1}^* | J_0, \dots, J_{k-1}] \quad (69)$$

where  $\hat{x}_k^*$  is the Kalman state.  $J_0^{k-1}, \Upsilon_k, \mathcal{I}_k, w_k$  are jointly-Gaussian and independent, and we have

$$\mathbb{E}[J_n J_k^\top] = Q_k \delta_{n=k}, \quad (70)$$

$$\mathbb{E}[\mathcal{I}_k J_k^\top] = S_k K_k^\top \Pi_k^\top, \quad (71)$$

$$\mathbb{E}[\Upsilon_k J_k^\top] = \Sigma_{\Upsilon_k} A_k^\top \Phi_k^\top. \quad (72)$$

We can write

$$\begin{aligned} \Upsilon_{k+1} - A_k \Upsilon_k &= \hat{x}_k^* - A_k \hat{x}_{k-1}^* - [\mathbb{E}[\hat{x}_k^* | J_0^k] - A_k \mathbb{E}[\hat{x}_{k-1}^* | J_0^{k-1}]] \\ &= K_k \mathcal{I}_k - K_k \mathbb{E}[\mathcal{I}_k | J_0^k] - A_k [\mathbb{E}[\hat{x}_{k-1}^* | J_0^k] - \mathbb{E}[\hat{x}_{k-1}^* | J_0^{k-1}]] \end{aligned} \quad (73)$$

Since  $J_0^k$  is an independent sequence, and since  $\mathcal{I}_k$  depends only on  $J_k$ ,

$$K_k \mathbb{E}[\mathcal{I}_k | J_0^k] = K_k \mathbb{E}[\mathcal{I}_k | J_k] = K_k S_k K_k^\top \Pi_k^\top Q_k^\dagger J_k. \quad (74)$$

We also have that  $\Upsilon_k, J_k$  are independent of  $J_0^{k-1}$ , implying

$$\begin{aligned} \mathbb{E}[\hat{x}_{k-1}^* | J_0^k] - \mathbb{E}[\hat{x}_{k-1}^* | J_0^{k-1}] &= \mathbb{E}[\hat{x}_{k-1}^* - \mathbb{E}[\hat{x}_{k-1}^* | J_0^{k-1}] | J_0^k] \\ &= \mathbb{E}[\Upsilon_k | J_0^k] = \mathbb{E}[\Upsilon_k | J_k] \\ &= \Sigma_{\Upsilon_k} A_k^\top \Phi_k^\top Q_k^\dagger J_k. \end{aligned} \quad (75)$$

Hence,

$$\Upsilon_{k+1} = A_k \Upsilon_k + K_k \mathcal{I}_k - \Psi_k Q_k^\dagger J_k, \quad (76)$$

where we denote

$$\Psi_k \triangleq M_k \Pi_k^\top + A_k \Sigma_{\Upsilon_k} A_k^\top \Phi_k^\top. \quad (77)$$

The covariance is then given by the recursive form

$$\begin{aligned} \Sigma_{\Upsilon_{k+1}} &= A_k \Sigma_{\Upsilon_k} A_k^\top + M_k + \Psi_k Q_k^\dagger \Psi_k^\top \\ &\quad - A_k \Sigma_{\Upsilon_k} A_k^\top \Phi_k^\top Q_k^\dagger \Psi_k^\top - K_k S_k K_k^\top \Pi_k^\top Q_k^\dagger \Psi_k^\top \end{aligned} \quad (78)$$

$$- \left[ A_k \Sigma_{\Upsilon_k} A_k^\top \Phi_k^\top Q_k^\dagger \Psi_k^\top \right]^\top - \left[ K_k S_k K_k^\top \Pi_k^\top Q_k^\dagger \Psi_k^\top \right]^\top \quad (79)$$

$$= A_k \Sigma_{\Upsilon_k} A_k^\top + M_k - \Psi_k Q_k^\dagger \Psi_k^\top. \quad (80)$$

At time  $k = 0$  we have  $\Upsilon_0 = 0$  and  $\Sigma_{\Upsilon_0} = 0$ .

*Remark E.1* (The non-reduced case). For the full, non-reduced linear filter (14)-(15), we have the following similar formula

$$v_k = \begin{bmatrix} \mathcal{I}_{k-1} \\ v_{k-1} \end{bmatrix} - \begin{bmatrix} S_{k-1} & 0 \\ 0 & \Sigma_{v_{k-1}} \end{bmatrix} \begin{bmatrix} \pi_{k-1}^\top \\ \phi_{k-1}^\top \end{bmatrix} Q_{k-1}^\dagger J_{k-1} \quad (81)$$

and

$$\Sigma_{v_k} = \begin{bmatrix} S_{k-1} & 0 \\ 0 & \Sigma_{v_{k-1}} \end{bmatrix} - \begin{bmatrix} S_{k-1} & 0 \\ 0 & \Sigma_{v_{k-1}} \end{bmatrix} \begin{bmatrix} \pi_{k-1}^\top \\ \phi_{k-1}^\top \end{bmatrix} Q_{k-1}^\dagger \begin{bmatrix} \pi_{k-1}^\top \\ \phi_{k-1}^\top \end{bmatrix}^\top \begin{bmatrix} S_{k-1} & 0 \\ 0 & \Sigma_{v_{k-1}} \end{bmatrix}. \quad (82)$$

Notice, however, that the dimension of  $v_k$  grows with time  $k$ .



## F A Generalized extremal problem with semidefinite constraints (proof of Thm. 4.3)

In this section we prove Theorem 4.3. We start with a brief overview of the extremal problem of finding a minimal distance between distributions, and of general semi-definite programs.

To prove the Theorem we observe that (28), is a generalization of the extremal problem, and suggest a non-trivial dual form where, under our assumptions, strong duality holds.

### F.1 Minimal distance between distributions

Consider two Gaussian distributions on  $\mathbb{R}^n$  with zero means and PSD covariance matrices  $\Sigma_1, \Sigma_2$  respectively. We consider the problem of constructing a Gaussian vector  $[X, Y]$  minimizing  $\mathbb{E}\|X - Y\|^2$  while inducing the given marginal distributions,  $X \sim \mathcal{N}(0, \Sigma_1), Y \sim \mathcal{N}(0, \Sigma_2)$ . This problem is equivalent to the following maximization of correlation [13]

$$\text{Tr}\{2\Pi\} \rightarrow \max_{\Pi}, \quad \text{s.t. } \Sigma = \begin{bmatrix} \Sigma_1 & \Pi \\ \Pi^\top & \Sigma_2 \end{bmatrix} \succeq 0. \quad (83)$$

We have the following results of Olkin and Pukelsheim [13].

**Lemma F.1.** [13, Lemma 1]. Let  $\Sigma_2^g$  be any generalized inverse of  $\Sigma_2$ . Then  $\Sigma \succeq 0$  iff

$$\Sigma_2 \Sigma_2^g \Pi^\top = \Pi^\top \text{ and } \Sigma_1 - \Pi \Sigma_2^g \Pi^\top \succeq 0. \quad (84)$$

**Theorem F.2.** [13, Thm. 4]. If  $\text{Im}\{\Sigma_2\} \subseteq \text{Im}\{\Sigma_1\}$ , then an optimal solution to (83) is given by

$$\max_{\Pi} \text{Tr}\{2\Pi\} = 2\text{Tr}\left\{\left(\Sigma_2^{1/2} \Sigma_1 \Sigma_2^{1/2}\right)^{1/2}\right\}, \quad (85)$$

achieved by the argument

$$\Pi^* = \Sigma_1 \Sigma_2^{1/2} \left[ \left( \Sigma_2^{1/2} \Sigma_1 \Sigma_2^{1/2} \right)^{1/2} \right]^g \Sigma_2^{1/2}. \quad (86)$$

In the case where  $\text{Im}\{\Sigma_2\} = \text{Im}\{\Sigma_1\}$ ,  $\Pi^*$  is a unique optimal argument.

Under the setting discussed in Sec. 2, Theorem F.2 implies that in the more general case where  $\Sigma_x \succeq 0$ , the MSE-optimal perfect perceptual-quality estimator (2) is obtained by

$$\hat{x} = \mathcal{T}^* x^* + w, \quad \mathcal{T}^* \triangleq \Sigma_x \Sigma_{x^*}^{\frac{1}{2}} \left( \Sigma_{x^*}^{\frac{1}{2}} \Sigma_x \Sigma_{x^*}^{\frac{1}{2}} \right)^{\frac{1}{2} \dagger} \Sigma_{x^*}^{\frac{1}{2} \dagger}. \quad (87)$$

Here again,  $w$  is a zero-mean Gaussian noise with covariance  $\Sigma_w = \Sigma_x - \mathcal{T}^* \Sigma_{x^*} \mathcal{T}^{*\top}$ , independent of  $y$  and  $x$ , and  $\Sigma_{x^*}^{\dagger}$  is the Moore-Penrose inverse of  $\Sigma_{x^*}$ .

### F.2 SDP Setting and duality - background

*Semi-definite programming* (SDP) [9, 17] is an optimization problem in  $X \in \mathbb{R}^{n \times n}$  of the form

$$C \bullet X \rightarrow \max_X \quad (88)$$

$$\text{s.t. } A_i \bullet X = b_i, i = 1, \dots, m, \quad (89)$$

$$X \succeq 0. \quad (90)$$

Here,  $C, A_i$  are real symmetric matrices of appropriate dimensions, and  $A \bullet X = \text{Tr}\{A^\top X\}$  is the Frobenius product. SDPs yield the Lagrangian

$$\begin{aligned} L(X, \lambda, \nu) &= \nu^\top b + \left( C - \sum_{i=0}^m \nu_i A_i \right) \bullet X + \lambda \rho_{\min}(X) \\ &= \nu^\top b + \left( C - \sum_{i=0}^m \nu_i A_i \right) \bullet X + \min_{Y \succeq 0, \text{Tr} Y = \lambda} Y \bullet X, \end{aligned} \quad (91)$$

where  $\lambda \geq 0$  and  $\rho_{\min}$  is the minimal eigenvalue. The Dual problem (DSP) is given by

$$\nu^\top b \rightarrow \min_{\nu}, \quad \text{s.t. } C - \sum_{i=0}^m \nu_i A_i \preceq 0. \quad (92)$$

In this case, strong duality exists iff the SDP is strictly feasible, *i.e.* it has a feasible solution interior to the feasible set,  $X \succ 0$ . This condition is sometimes referred to as the *Slater condition*.

### F.3 A generalized extremal problem with strong duality

Recall  $Q_k, M_k, B_k$  are real, symmetric positive semidefinite  $n_x \times n_x$  matrices, and the optimization problem (28),

$$\text{Tr} \left\{ \tilde{\Pi}_k M_k B_k \right\} = \text{Tr} \left\{ \tilde{\Pi}_k M_k M_k^\dagger M_k B_k \right\} \rightarrow \max_{\tilde{\Pi}_k}, \text{ s.t. } Q_k - \tilde{\Pi}_k M_k \tilde{\Pi}_k^\top \succeq 0. \quad (93)$$

Since (93) involves a single time step, we will omit the index  $k$ .

We consider  $\Pi = \tilde{\Pi} M$ , hence  $\Pi^\top = M M^\dagger \Pi^\top$ , and since  $M = M M^\dagger M$  we rewrite (93) as

$$\text{Tr} \{ \Pi B \} = \text{Tr} \{ B \Pi \} \rightarrow \max_{\Pi}, \text{ s.t. }, Q - \Pi M^\dagger \Pi^\top \succeq 0, \Pi^\top = M M^\dagger \Pi^\top. \quad (94)$$

By Lemma F.1, the constraints in (94) are equivalent to

$$X \triangleq \begin{bmatrix} Q & \Pi \\ \Pi^\top & M \end{bmatrix} \succeq 0. \quad (95)$$

This can be formulated as the semi-definite program,

$$C \bullet X \rightarrow \max_X, \text{ s.t. } \begin{cases} A_{ij}^Q \bullet X = Q_{ij}, 0 \leq i \leq j \leq n-1, \\ A_{ij}^M \bullet X = M_{ij} \end{cases}, X \succeq 0, \quad (96)$$

where  $C = \frac{1}{2} \begin{bmatrix} 0 & B \\ B & 0 \end{bmatrix}$ , and  $A_{ij}^Q = \begin{bmatrix} \Lambda_{ij} & 0 \\ 0 & 0 \end{bmatrix}$ ,  $A_{ij}^M = \begin{bmatrix} 0 & 0 \\ 0 & \Lambda_{ij} \end{bmatrix}$ ,  $\Lambda_{ij} = \frac{1}{2}(e_{ij} + e_{ji})$ .

Note that when  $B$  is a scalar matrix, (94) is similar to the problem studied in Olkin and Pukelsheim [13]. Their approach was later extended by Shapiro [15] to general linear objectives, where the Slater condition holds.

#### F.3.1 Strong duality

The SDP (96) yields the standard dual formulation

$$Q \bullet \nu_Q + M \bullet \nu_M \rightarrow \min_{\nu_Q, \nu_M}, \text{ s.t. } \begin{bmatrix} \nu_Q & -\frac{1}{2}B \\ -\frac{1}{2}B & \nu_M \end{bmatrix} \succeq 0, \nu_Q, \nu_M \in \mathbb{R}^{n_x \times n_x}. \quad (97)$$

This should give us a hint about the optimal solution to (94). Pay attention, however, that according to the theory, strong duality in (97) is guaranteed only if  $Q, M \succ 0$ , which might not be the case (see e.g. [15]). To get a tight bound for the general case  $Q, M \succeq 0$ , we now provide an alternative form of duality to (94).

The following is an adaptation of techniques used in Olkin and Pukelsheim [13]. We start with the following Lemma.

**Lemma F.3.** *Let  $\Pi$  be a feasible solution to (94),  $R, G \in \mathbb{R}^{n_x \times n_x}$  are general matrices. Then,*

$$\text{Tr} \{ Q R R^\top + B M B G G^\top \} \geq 2 \text{Tr} \{ \Pi B G R^\top \}. \quad (98)$$

*Proof.* From the non-negativity of  $X$  in (95) we have

$$\begin{aligned} [R^\top, -G^\top B] \begin{bmatrix} Q & \Pi \\ \Pi^\top & M \end{bmatrix} \begin{bmatrix} R \\ -BG \end{bmatrix} = \\ R^\top Q R + G^\top B M B G - R^\top \Pi B G - G^\top B \Pi^\top R \succeq 0. \end{aligned} \quad (99)$$

The trace is nonnegative, hence we have the desired result.  $\square$

*Remark F.4.* Similarly, we can obtain

$$\text{Tr} \{ Q B R R^\top B + M G G^\top \} \geq 2 \text{Tr} \{ B \Pi G R^\top \}. \quad (100)$$

Now, we suggest an alternative to (DSP) (97), where strong duality will hold.

**Theorem F.5.** [Strong duality]. Let

$$\Omega = \{ \Pi \in \mathbb{R}^{n_x \times n_x} : Q - \Pi M^\dagger \Pi^\top \succeq 0, \Pi^\top = M M^\dagger \Pi^\top \}, \quad (101)$$

$$\mathcal{S} = \{ (S, S^-) : S, S^- \succeq 0, S S^- S = S, S^- S S^- = S^-, B M = S S^- B M \}, \quad (102)$$

and denote  $M_B \triangleq B M B$ . Assume  $\text{Im} \{M_B\} \subseteq \text{Im} \{Q\}$ . Then,

$$\begin{aligned} \min_{(S, S^-) \in \mathcal{S}} \{Q \bullet S + M \bullet (B S^- B)\} &= \max_{\Pi \in \Omega} \text{Tr} \{2 \Pi B\} \\ &= 2 \text{Tr} \left\{ \left( M_B^{1/2} Q M_B^{1/2} \right)^{1/2} \right\}. \end{aligned} \quad (103)$$

The extreme value is obtained for

$$S^* = M_B^{1/2} \left( M_B^{1/2} Q M_B^{1/2} \right)^{1/2\dagger} M_B^{1/2}, \quad (104)$$

$$S^{-*} = M_B^{1/2\dagger} \left( M_B^{1/2} Q M_B^{1/2} \right)^{1/2} M_B^{1/2\dagger}, \quad (105)$$

$$\Pi^* = Q S^* M_B^\dagger B M = Q M_B^{1/2} \left( M_B^{1/2} Q M_B^{1/2} \right)^{1/2\dagger} M_B^{1/2\dagger} B M. \quad (106)$$

Optimal solution  $\Pi^*$  is generally not unique.

To prove strong duality, we will use the following lemmas.

**Lemma F.6.** Assume PSD matrices  $Q, M_B$  such that  $\text{Im} \{M_B\} \subseteq \text{Im} \{Q\}$ , then  $\text{Im} \{M_B\} = \text{Im} \left\{ M_B^{1/2} Q M_B^{1/2} \right\}$ .

*Proof.* Recall  $M_B, M_B^{1/2} Q M_B^{1/2}$  are real symmetric matrices.

Let  $v \in \text{Ker} \{M_B^{1/2} Q M_B^{1/2}\}$ , we have  $\|Q^{1/2} M_B^{1/2} v\| = 0$  hence  $M_B^{1/2} v \in \text{Ker} \{Q^{1/2}\} \subseteq \text{Ker} \{M_B^{1/2}\}$ , which yields  $M_B v = 0$ , implying  $\text{Ker} \{M_B^{1/2} Q M_B^{1/2}\} \subseteq \text{Ker} \{M_B\}$ . Opposite relation is trivial.

We have

$$\text{Im} \{M_B\} = \text{Ker} \{M_B\}^\perp = \text{Ker} \{M_B^{1/2} Q M_B^{1/2}\}^\perp = \text{Im} \left\{ M_B^{1/2} Q M_B^{1/2} \right\}. \quad (107)$$

□

**Lemma F.7.**  $\text{Im} \{B M\} \subseteq \text{Im} \{B M B\}$ .

*Proof.* Let  $v \in \text{Ker} \{B M B\}$ , then  $\|M^{1/2} B v\| = 0$  and  $B v \in \text{Ker} \{M^{1/2}\} = \text{Ker} \{M\}$ . Hence  $\text{Ker} \{B M B\} \subseteq \text{Ker} \{B M\}$ . We have

$$\text{Im} \{B M\} = \text{Ker} \{B M\}^\perp \subseteq \text{Ker} \{B M B\}^\perp = \text{Im} \{B M B\}. \quad (108)$$

□

We are now ready to prove Theorem F.5.

*Proof.* [Theorem F.5]. Let  $\Pi \in \Omega$ , then  $X \succeq 0$  in (95). For any  $(S, S^-) \in \mathcal{S}$  we can choose  $R = S^{1/2}, G = S^- R$ . From the result of Lemma F.3 it follows that

$$\begin{aligned} Q \bullet S + M \bullet (B S^- B) &= \text{Tr} \{Q R R^\top + B M B G G^\top\} \\ &\geq 2 \text{Tr} \{ \Pi B G R^\top \} = 2 \text{Tr} \{ \Pi B S^- S \} = 2 \text{Tr} \{ \Pi B \}. \end{aligned} \quad (109)$$

The last equality holds since  $B M = S S^- B M$ , and  $\text{Im} \{\Pi^\top\} \subseteq \text{Im} \{M\}$ .

We now prove that  $\Pi^* \in \Omega$ .

$$\begin{aligned}
& Q - \Pi^* M^\dagger \Pi^{*\top} \\
&= Q - Q M_B^{1/2} \left( M_B^{1/2} Q M_B^{1/2} \right)^{1/2\dagger} M_B^{\dagger 1/2} B M M^\dagger M B M_B^{\dagger 1/2} \left( M_B^{1/2} Q M_B^{1/2} \right)^{1/2\dagger} M_B^{1/2} Q \\
&= Q - Q M_B^{1/2} \left( M_B^{1/2} Q M_B^{1/2} \right)^\dagger M_B^{1/2} Q \\
&= Q^{1/2} \left[ I - Q^{1/2} M_B^{1/2} \left( M_B^{1/2} Q M_B^{1/2} \right)^\dagger M_B^{1/2} Q^{1/2} \right] Q^{1/2} \\
&= Q^{1/2} \left[ I - Q^{1/2} M_B^{1/2} \left( M_B^{1/2} Q M_B^{1/2} \right)^\dagger M_B^{1/2} Q^{1/2} \right]^2 Q^{1/2} \succeq 0.
\end{aligned} \tag{110}$$

The last equality holds since it is easy to see that  $\left[ I - Q^{1/2} M_B^{1/2} \left( M_B^{1/2} Q M_B^{1/2} \right)^\dagger M_B^{1/2} Q^{1/2} \right]$  is a symmetric (orthogonal) projection.

We further prove that  $S^*, S^{-*} \in \mathcal{S}$ . It is easy to show that  $S^*, S^{-*}$  are symmetric generalized inverses, reflexive to each other ( $S^{-*}$  is in fact the Moore-Penrose inverse of  $S^*$ ):

$$S^* S^{-*} = M_B^{1/2} \left( M_B^{1/2} Q M_B^{1/2} \right)^{1/2\dagger} M_B^{1/2} M_B^{1/2\dagger} \left( M_B^{1/2} Q M_B^{1/2} \right)^{1/2} M_B^{1/2\dagger} \tag{111}$$

$$= M_B^{1/2} \left( M_B^{1/2} Q M_B^{1/2} \right)^{1/2\dagger} \left( M_B^{1/2} Q M_B^{1/2} \right)^{1/2} M_B^{1/2\dagger} \tag{112}$$

$$= M_B^{1/2} M_B^{1/2\dagger} = M_B^{1/2\dagger} M_B^{1/2} \tag{113}$$

$$= S^{-*} S^*. \tag{114}$$

The equalities hold since by Lemma F.6,

$$\text{Im} \left\{ M_B^{1/2} \right\} = \text{Im} \{ M_B \} = \text{Im} \left\{ M_B^{1/2} Q M_B^{1/2} \right\} = \text{Im} \left\{ \left( M_B^{1/2} Q M_B^{1/2} \right)^{1/2} \right\}, \tag{115}$$

and since for a PSD matrix  $R$ ,  $R R^\dagger = R^\dagger R$  is an orthogonal projection onto its image. Using Lemma F.7 we have

$$S^* S^{-*} B M = M_B^{1/2\dagger} M_B^{1/2} B M = B M. \tag{116}$$

It is now easy to verify that

$$Q \bullet S^* + M \bullet (B S^{-*} B) = 2 \text{Tr} \{ \Pi^* B \} = 2 \text{Tr} \left\{ \left( M_B^{1/2} Q M_B^{1/2} \right)^{1/2} \right\}, \tag{117}$$

which completes the proof.  $\square$

**Corollary F.8.** Under the assumption,  $\text{Im} \{ M_B \} \subseteq \text{Im} \{ Q_k \}$ , the optimal gain in (28) is given by

$$\Pi_k^* = Q_k M_B^{1/2} \left( M_B^{1/2} Q_k M_B^{1/2} \right)^{1/2\dagger} M_B^{\dagger 1/2} B_k. \tag{118}$$

*Remark F.9.* Under the alternative assumption,  $\text{Im} \{ M_k \} \subseteq \text{Im} \{ Q_k \}$ , the optimal gain in (28) is given by

$$\Pi_k^* = Q_k \tilde{B} M_b^{1/2} \left( M_b^{1/2} Q_b M_b^{1/2} \right)^{1/2\dagger} M_b^{\dagger 1/2} \tilde{B}, \tag{119}$$

where  $\tilde{B} = B_k^{1/2}$ ,  $Q_b = \tilde{B} Q_k \tilde{B}$ ,  $M_b = \tilde{B} M_k \tilde{B}$ .

*Proof.* Recall our goal in (28) is to maximize  $\text{Tr} \{ \Pi M B \} = \text{Tr} \left\{ \tilde{B} \Pi M \tilde{B} \right\}$  under the condition  $Q - \Pi M \Pi^\top \succeq 0$  (we omit the index  $k$ ). This is equivalent to minimizing  $\mathbb{E} \left[ \|\tilde{B} X - \tilde{B} Y\|^2 \right]$  w.r.t  $\Pi$ , where  $(X, Y) \sim \mathcal{N}(0, \Sigma)$  and  $\Sigma = \begin{bmatrix} Q & \Pi M \\ M \Pi^\top & M \end{bmatrix} \succeq 0$ .

In this case,  $(\tilde{B}X, \tilde{B}Y) \sim \mathcal{N}(0, \Sigma_b)$  where  $\Sigma_b = \begin{bmatrix} \tilde{B}Q\tilde{B} & \tilde{B}\Pi M\tilde{B} \\ \tilde{B}M\Pi^\top \tilde{B} & \tilde{B}M\tilde{B} \end{bmatrix}$ . According to Thm. F.2, under the assumption  $\text{Im}\{\tilde{B}M\tilde{B}\} \subseteq \text{Im}\{\tilde{B}Q\tilde{B}\}$ , the minimal distance is achieved when

$$\tilde{B}\Pi M\tilde{B} = \tilde{B}Q\tilde{B}M_b^{\frac{1}{2}} \left( M_b^{\frac{1}{2}} Q_b M_b^{\frac{1}{2}} \right)^{\frac{1}{2}\dagger} M_b^{\frac{1}{2}}. \quad (120)$$

Note that  $\text{Im}\{M\} \subseteq \text{Im}\{Q\}$  implies  $\text{Im}\{\tilde{B}M\tilde{B}\} \subseteq \text{Im}\{\tilde{B}Q\tilde{B}\}$ , and it is straightforward to verify that  $Q - \Pi^* M \Pi^{*\top} \succeq 0$ .  $\square$

## G Stationary settings

A note is in place regarding the stationary perceptual Kalman filter. In the Kalman steady-state regime, where dynamics (31) -(32) are time-invariant and  $T \rightarrow \infty$ , the matrices  $K$  and  $S$  in Algorithm 2 are determined by the covariance matrix  $P$ ,

$$K = PC^\top(CPC^\top + R)^{-1}, \quad S = CPC^\top + R. \quad (121)$$

Here,  $C$  stands for the time-invariant observation matrix ( $y_k = Cx_k + r_k$ ) and  $P$  is a solution to the Discrete-Time Algebraic Riccati equation (DARE)

$$P = APA^\top - APC^\top(CPC^\top + R)^{-1}CPA^\top + Q. \quad (122)$$

Similarly, under the steady-state regime, (26) becomes

$$\begin{cases} \text{Tr}\{D\} & \rightarrow \min_{\Pi} \\ \text{s.t.} & D = ADA^\top + Q + M - \Pi M - M\Pi^\top, M = KSK^\top, Q - \Pi M\Pi^\top \succeq 0 \end{cases} \quad (123)$$

where  $D$  obeys an (Algebraic) Lyapunov equation. If  $A$  is stable,

$$D(\Pi) = \sum_{k=0}^{\infty} A^k (Q + M - \Pi M - M\Pi^\top) (A^k)^\top. \quad (124)$$

Hence, stationary perceptual filter is of the form

$$\hat{x}_k = A\hat{x}_{k-1} + J_k, \quad (125)$$

$$J_k = \Pi K \mathcal{I}_k + w_k, \quad (126)$$

$$w_k \sim \mathcal{N}(0, Q - \Pi M\Pi^\top), \quad (127)$$

and in order to find optimal gain  $\Pi$ , minimizing  $\text{Tr}\{D(\Pi)\}$ , we have to solve

$$\max_{\Pi} \text{Tr}\{\Pi M B\} \text{ s.t. } Q - \Pi M\Pi^\top \succeq 0, \quad (128)$$

where we define  $B \triangleq \sum_{k=0}^{\infty} (A^k)^\top A^k$ , and the solution (under the assumption  $\text{Im}\{BMB\} \subseteq \text{Im}\{Q\}$ ) is given again by (30).

## H List of notations

We summarize our notations in the following Table.

Table 2: Definitions and Notations

| Notation                   | Description                                | Definition                                                                  | Dimensions                       |
|----------------------------|--------------------------------------------|-----------------------------------------------------------------------------|----------------------------------|
| $n_x$                      | state dimension                            |                                                                             |                                  |
| $n_y$                      | measurement dimension                      |                                                                             |                                  |
| $A_k$                      | system dynamics                            |                                                                             | $n_x \times n_x$                 |
| $C_k$                      | measurement function                       |                                                                             | $n_y \times n_x$                 |
| $Q_k, R_k$                 | noise covariances                          |                                                                             | $n_x \times n_x, n_y \times n_y$ |
| $x_k$                      | system state (ground-truth)                |                                                                             | $n_x$                            |
| $y_k$                      | measurements                               |                                                                             | $n_y$                            |
| $\hat{x}_k$                | state estimator                            |                                                                             | $n_x$                            |
| $\hat{x}_k^*$              | optimal Kalman state                       | see Algorithm 2                                                             | $n_x$                            |
| $\hat{x}_{k s}$            | best MSE state estimators, up to time $s$  |                                                                             | $n_x$                            |
| $\mathcal{I}_k$            | innovation process                         | see Algorithm 2                                                             | $n_y$                            |
| $S_k$                      | innovation covariance                      | see Algorithm 2                                                             | $n_y \times n_y$                 |
| $K_k$                      | Kalman gain                                | see Algorithm 2                                                             | $n_x \times n_y$                 |
| $\Pi_k$                    | innovation perceptual gain                 |                                                                             | $n_x \times n_x$                 |
| $M_k$                      | Kalman update covariance                   | $M_k = K_k S_k K_k^\top$                                                    | $n_x \times n_x$                 |
| $v_k$                      | unutilized information process             | see (15)                                                                    | $kn_y$                           |
| $\Upsilon_k$               | unutilized information process (recursive) | see (19)                                                                    | $n_x$                            |
| $\Sigma_{\Upsilon_k}$      | unutilized information covariance          |                                                                             | $n_x \times n_x$                 |
| $\Phi_k$                   | unutilized information perceptual gain     |                                                                             | $n_x \times n_x$                 |
| $B_k$                      | weight matrix                              | $B_k = \sum_{t=k}^T \alpha_t (A^{t-k})^\top A^{t-k}$                        | $n_x \times n_x$                 |
| $D_k$                      | deviation from MMSE                        | $D_k = \mathbb{E} [\hat{x}_k^* - \hat{x}_k] [\hat{x}_k^* - \hat{x}_k]^\top$ | $n_x \times n_x$                 |
| $T$                        | Termination time (horizon)                 |                                                                             |                                  |
| $\mathcal{C}(\hat{X}_0^T)$ | minimization objective                     | $\mathcal{C} = \sum_{k=0}^T \alpha_k \mathbb{E} [\ x_k - \hat{x}_k\ ^2]$    |                                  |

## I Numerical demonstrations

In this section we provide full details for the experimental settings of Sec. 5, with additional numerical and visual results. In the following, we compare the performance of several filters;  $\hat{x}_{\text{kal}}^*$  and  $\hat{x}_{\text{tic}}$  correspond to the Kalman filter and the temporally-inconsistent filter (10) (which does not possess perfect-perceptual quality). The estimate  $\hat{x}_{\text{opt}}$  is generated by a perfect-perception filter obtained by numerically optimizing the coefficients in (18), where the cost is the MSE at termination time, *i.e.* the *terminal cost*

$$\mathcal{C}_T = \mathbb{E} [\|\hat{x}_T - x_T\|^2]. \quad (129)$$

The estimates  $\hat{x}_{\text{auc}}, \hat{x}_{\text{minT}}$  correspond to PKF outputs (Alg. 1) minimizing the *total cost* (area under curve)

$$\mathcal{C}_{\text{auc}} = \sum_{k=0}^T \mathbb{E} [\|\hat{x}_k - x_k\|^2], \quad (130)$$

and the *terminal cost*, respectively. Finally,  $\hat{x}_{\text{stat.}}$  is the stationary PKF, discussed in App. G. The filters are summarized in Table 3.

Table 3: List of demonstrated filters.

|                          | description                                             | definition  | perfect-perception |          |
|--------------------------|---------------------------------------------------------|-------------|--------------------|----------|
|                          |                                                         |             | per-sample         | temporal |
| $\hat{x}_{\text{kal}}^*$ | Kalman filter                                           | Algorithm 2 | ✗                  | ✗        |
| $\hat{x}_{\text{tic}}$   | Per-sample perceptual quality (temporally-inconsistent) | (10)        | ✓                  | ✗        |
| $\hat{x}_{\text{opt}}$   | Optimized perfect-perceptual quality filter             | (18)        | ✓                  | ✓        |
| $\hat{x}_{\text{auc}}$   | PKF with total cost                                     | Algorithm 1 | ✓                  | ✓        |
| $\hat{x}_{\text{minT}}$  | PKF with terminal cost                                  | Algorithm 1 | ✓                  | ✓        |
| $\hat{x}_{\text{stat.}}$ | Stationary PKF                                          | (125)       | ✗                  | ✗        |

### I.1 Example: Harmonic oscillator

We start with a simple 2-D example, where we demonstrate the differences in MSE distortion between the optimized perfect-perceptual quality filter  $\hat{x}_{\text{opt}}$ , the temporally inconsistent filter  $\hat{x}_{\text{tic}}$  and the efficient sub-optimal (perceptual) PKF. Consider the harmonic oscillator, where the entries of the state  $x_k \in \mathbb{R}^2$  correspond to position and velocity, and evolve as

$$x_{k+1} = Ax_k + q_k, \quad q_k \sim \mathcal{N}(0, I) \quad (131)$$

with

$$A = I + \begin{bmatrix} 0 & 1 \\ -2 & 0 \end{bmatrix} \times \Delta_t, \quad (132)$$

where  $\Delta_t = 5 \times 10^{-3}$  is the sampling interval. Assume we have access to noisy and delayed scalar observations of the position (corresponding to time  $t - \frac{1}{2}\Delta_t$ ) so that  $y_k = \begin{bmatrix} 1 & -\frac{1}{2} \end{bmatrix} x_k + r_k$ , where  $r_k \sim \mathcal{N}(0, 1)$  and  $x_0 \sim \mathcal{N}(0, 0.8I)$ .

We numerically optimize the coefficients  $\{\Pi_k, \Phi_k\}_{k=0}^T$  in (18), to minimize the terminal error (129) ( $\text{Tr}\{D_T\}$  in (23)) at time  $T = 255$  under the constraints (20). Figure 7 shows the MSE distortion for the optimized perfect-perception filter  $\hat{x}_{\text{opt}}$  defined by (18) and  $\{\Pi_k, \Phi_k\}_{k=0}^T$ , and the sub-optimal PKF outputs  $\hat{x}_{\text{auc}}, \hat{x}_{\text{minT}}$ , minimizing the total cost (130) and the terminal cost (129) (see Table 3). We observe that PKF estimations are indeed not MSE optimal at time  $T$ . However, their RMSE at time  $T$  is only  $\sim 30\%$  higher than that of  $\hat{x}_{\text{opt}}$  and they have the advantage that they can be solved analytically and require computing only half of the coefficients ( $\Pi_k$ ).

The estimates  $\hat{x}_{\text{kal}}^*$  and  $\hat{x}_{\text{tic}}$  achieve lower MSE than  $\hat{x}_{\text{opt}}$ , however they do not possess perfect-perceptual quality. We can see the difference in MSE distortion between the filters  $\hat{x}_{\text{opt}}$  and  $\hat{x}_{\text{tic}}$ , with and without perception constraint in the temporal domain. *This is the cost of temporal consistency in online estimation for this setting.*



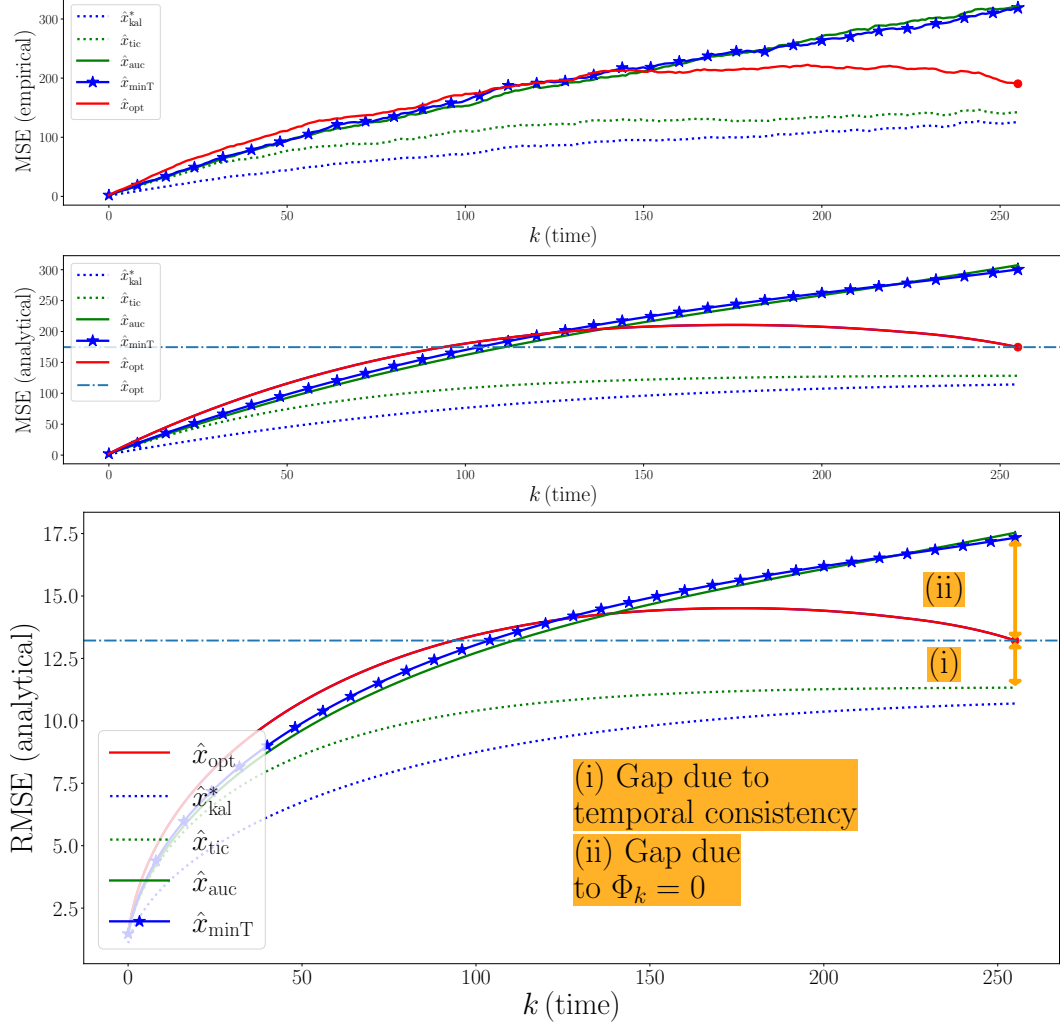

Figure 7: **MSE distortion on Harmonic oscillator.**  $\hat{x}_{opt}$  is a numerically optimized perfect-perceptual quality filter's output (minimizing error at time  $T = 255$ , dashed horizontal line).  $\hat{x}_{auc}$ ,  $\hat{x}_{minT}$  are PKF outputs minimizing different objectives. Observe that PKF estimations are not MSE optimal, but require less computations.  $\hat{x}_{kal}^*$  and  $\hat{x}_{tic}$  are not perfect-perceptual quality filters. **(top)** Empirical error, over  $N = 1024$  sampled trajectories. **(bottom)** Analytical error. The difference in distortion between the perfect-perceptual state  $\hat{x}_{opt}$ , optimized according to (18), and  $\hat{x}_{tic}$  is due to the perceptual constraint on the joint distribution. This is the cost of temporal consistency in online estimation for this setting. The gap between the MSE of the optimized estimator and  $\hat{x}_{minT}$  is due to the sub-optimal choice of coefficients,  $\Phi_k = 0$ .

## I.2 Example: Two coupled inverted pendulums

Next, we demonstrate the quantitative behavior of perceptual Kalman filters, by comparing the MSE between the PKF outputs when minimizing different cost functions, and between non-perceptual filters outputs. More specifically, this experiment demonstrates:

1. How minimizing different objectives in Algorithm 1 leads to different filters.
2. The cost of perfect-perceptual quality filtering, given by Algorithm 1, over optimal filters.

We consider a higher-dimensional, well-studied example of two coupled inverted pendulums, mounted on carts [7, 6]. The cart positions, pendulum deviations, and their velocities (Fig. 8), are given by the discretized stable closed-loop system with perturbation

$$x_{k+1} = Ax_k + q_k, \quad q_k \sim \mathcal{N}(0, Q), \quad (133)$$

where  $x_k \in \mathbb{R}^8$ . The initial state is distributed as

$$x_0 \sim \mathcal{N}(0, P_0). \quad (134)$$

The system matrices are given by

$$A = I + A_{cl} \cdot \Delta_t, \quad (135)$$

where  $\Delta_t = 5 \times 10^{-4}$  is the sampling interval and

$$A_{cl} = \begin{bmatrix} A_1 + BK_1 & F \\ F & A_2 + BK_2 \end{bmatrix}, \quad (136)$$

$$A_1 = A_2 = \begin{bmatrix} 0 & 1 & 0 & 0 \\ 2.9156 & 0 & -0.0005 & 0 \\ 0 & 0 & 0 & 1 \\ -1.6663 & 0 & 0.0002 & 0 \end{bmatrix}, \quad B = \begin{bmatrix} 0 \\ -0.0042 \\ 0 \\ 0.0167 \end{bmatrix}. \quad (137)$$

The coupling is given by

$$F = \begin{bmatrix} 0 & 0 & 0 & 0 \\ 0.0011 & 0 & 0.0005 & 0 \\ 0 & 0 & 0 & 0 \\ -0.0003 & 0 & -0.0002 & 0 \end{bmatrix}, \quad (138)$$

and stabilizing state-feedback controllers (each acts on a single cart) are

$$K_1 = [11396.0 \quad 7196.2 \quad 573.96 \quad 1199.0], \quad K_2 = [29241 \quad 18135 \quad 2875.3 \quad 3693.9]. \quad (139)$$

The partial measurements are given by  $y_k = Cx_k + r_k$ , where  $r_k \sim \mathcal{N}(0, R)$ , with coefficients

$$C = \begin{bmatrix} \bar{C}_1 & 0 \\ 0 & \bar{C}_2 \end{bmatrix}, \quad \bar{C}_1 = \bar{C}_2 = \begin{bmatrix} 1 & 0 & 0 & 0 \\ 0 & 0 & 1 & 0 \end{bmatrix}. \quad (140)$$

Namely, we observe only position and angle for each cart/pendulum, while velocities are not being measured.

The perturbation covariances are given by

$$P_0 = \begin{bmatrix} \bar{P}_0 & 0 \\ 0 & \bar{P}_0 \end{bmatrix}, \quad Q = \begin{bmatrix} \bar{Q} & 0 \\ 0 & \bar{Q} \end{bmatrix}, \quad R = \begin{bmatrix} \bar{R} & \frac{1}{8}\bar{R} \\ \frac{1}{8}\bar{R} & \bar{R} \end{bmatrix}, \quad (141)$$

where

$$\begin{aligned} \bar{P}_0 &= \begin{bmatrix} 0.154 & 0.142 & -0.143 & 0.093 \\ 0.142 & 0.144 & -0.124 & 0.058 \\ -0.143 & -0.124 & 0.167 & -0.148 \\ 0.093 & 0.058 & -0.148 & 0.192 \end{bmatrix} \cdot 5 \times 10^{-4}, \\ \bar{Q} &= 10^{-2} \cdot \begin{bmatrix} 0.642 & -0.136 & 0.78 & 0.262 \\ -0.136 & 0.894 & -0.248 & 0.074 \\ 0.78 & -0.248 & 1.284 & -0.314 \\ 0.262 & 0.074 & -0.314 & 1.766 \end{bmatrix} \times \Delta_t, \quad \bar{R} = 10^{-2} \cdot \begin{bmatrix} 0.375 & -0.33 \\ -0.33 & 0.771 \end{bmatrix} \times \Delta_t. \end{aligned} \quad (142)$$

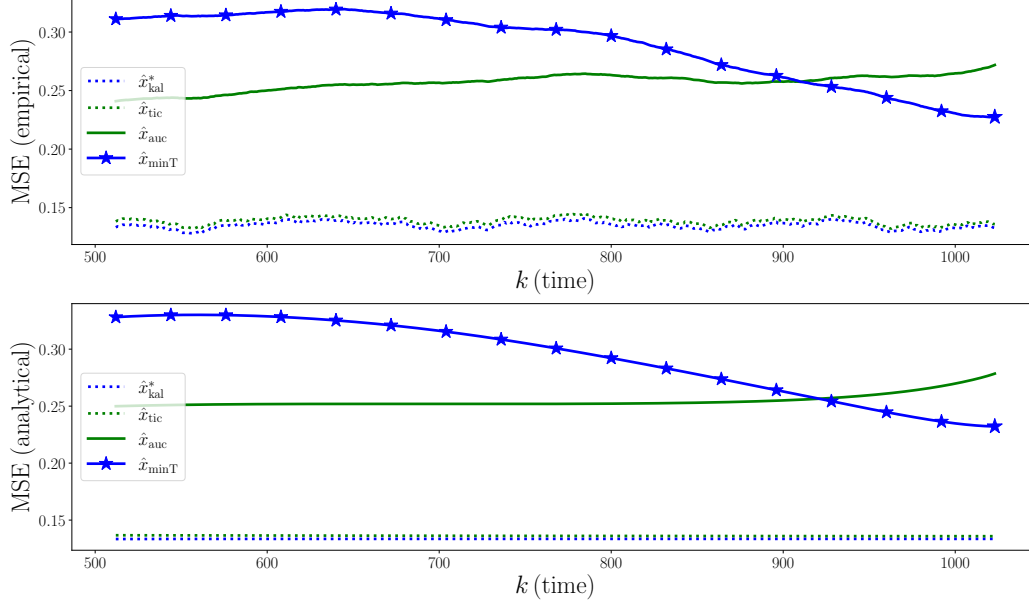

Figure 9: **MSE distortion on Coupled inverted pendulums for perceptual and non-perceptual filters (near the time  $T$ ).**  $\hat{x}_{\text{auc}}$ ,  $\hat{x}_{\text{minT}}$  are PKF outputs minimizing different objectives. Observe that while both possess perfect-perceptual quality, they yield different estimations. Also, pay attention to the MSE gap between the MSE-optimal, but not perceptual, Kalman filter and the PKFs.

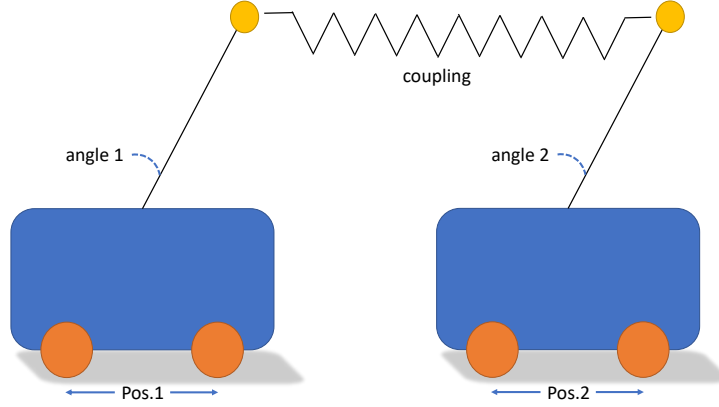

Figure 8: **Coupled inverted pendulums.**

We simulate the system for  $2^{10}$  time steps ( $T = 2^{10} - 1$ ), over  $N = 2^{10}$  independent experiments. In Figures 9 and 10 we show the MSE distortion as a function of time,  $\mathbb{E} [\|\hat{x}_k - x_k\|^2]$ , for the different filters of Table 3;  $\hat{x}_{\text{kal}}^*$  is the optimal Kalman filter.  $\hat{x}_{\text{tic}}$  is the perceptual filter without consistency constraints, given in (10).  $\hat{x}_{\text{auc}}$  is the PKF output minimizing the total cost (130).  $\hat{x}_{\text{minT}}$  (marked by ‘\*’) is the PKF output minimizing the terminal cost (129).

We observe that filters satisfying the perfect perceptual quality constraint ( $\hat{x}_{\text{auc}}$  and  $\hat{x}_{\text{minT}}$ ) achieve higher distortions compared to the per-sample only perceptual filter  $\hat{x}_{\text{tic}}$ , which in turn attains MSE distortion slightly higher than that of the MSE-optimal Kalman filter. This demonstrates again the cost of temporal consistency in online estimation. Note also that PKFs minimizing different cumulative objectives, yield different estimations; while  $\hat{x}_{\text{minT}}$  is optimal at termination time  $T$ ,  $\hat{x}_{\text{auc}}$  achieves a lower MSE on average. As we will see next, both filters attain the same perceptual quality.

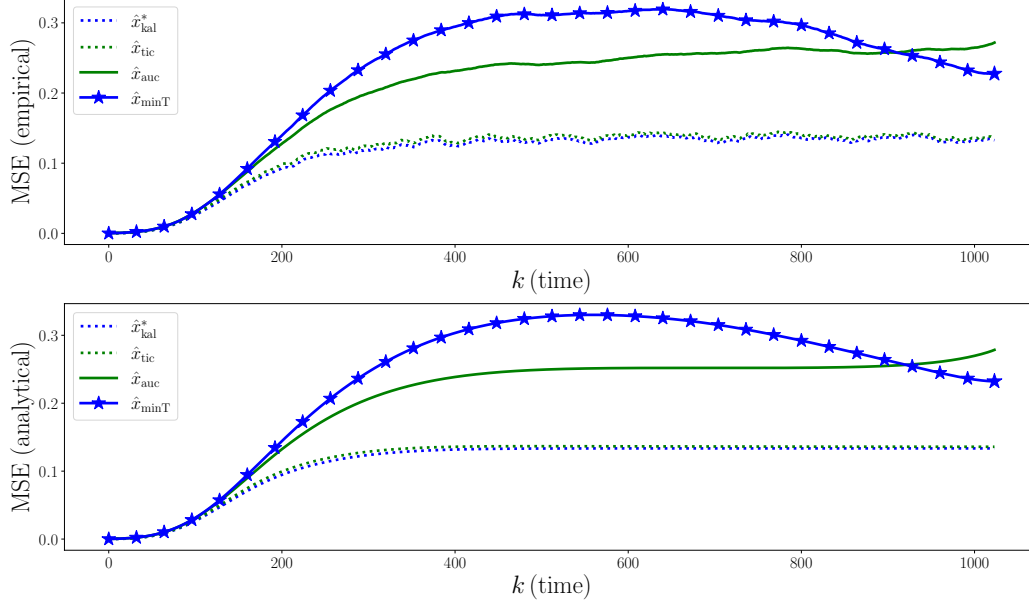

Figure 10: **MSE distortion on Coupled inverted pendulums for perceptual and non-perceptual filters (full view).**

In Fig. 11 we estimate the perceptual quality, given by the Wasserstein distance between the ground-truth distribution and the empirical Gaussian distributions of the different filters outputs. In Fig. 11(top) we estimate the distance between single-sample distributions, while in Fig. 11(bottom) we consider the joint distributions of 16 state-vectors,  $x_t, t \in [k-15, k]$ . Observe that while each sample of  $\hat{x}_{tic}$  is distributed similarly to its reference sample, it fails to attain perfect perceptual quality where we measure the distance from the real process distribution. PKF outputs attain low perceptual index (high quality) in both scenarios. We also present the perceptual quality measured for the ground-truth signal  $x_{gt}$  empirical distribution, as a reference.

Figure 12 shows the asymptotic behavior (empirical error for large horizon  $T$ ) of  $\hat{x}_{stat.}$ , the stationary PKF (125). The figure also presents the empirical errors for Kalman filter and its stationary version (multiplied by a factor of 2, which is an upper bound on the MSE distortion of perceptual estimators without temporal constraints, see [3]), and the theoretical steady-state error of (125), obtained by optimizing (128) (dashed horizontal line) for comparison. The error of the non-stationary perceptual filter  $\hat{x}_{auc}$  is also shown.

### I.3 Dynamic texture

Here we illustrate the qualitative effects of perceptual (temporally consistent) estimation in a simplified video restoration setting. Please see the supplementary video for the full videos. This setup visually demonstrates how:

1. Filters with no perfect perceptual quality tend to generate non-realistic images or atypical motion (random or slow movement, flickering artifacts etc.).
2. PKF outputs are natural to the domain, both spatially and temporally.

For this extent, we introduce the ‘Dynamic Texture’ domain. In this domain, video frames are generated from a latent state which represents their *Factor-Analysis* (FA) decomposition (see *e.g.* Bishop and Nasrabadi [2, Sec. 12.2.4] for more details). The dynamics in the FA domain are assumed to be linear, with a small Gaussian perturbation,

$$x_k^{\text{FA}} = A^{\text{FA}} x_{k-1}^{\text{FA}} + q_k, \quad x_0^{\text{FA}} \sim \mathcal{N}(0, I), \quad x_k^{\text{FA}} \in \mathbb{R}^{128}. \quad (144)$$

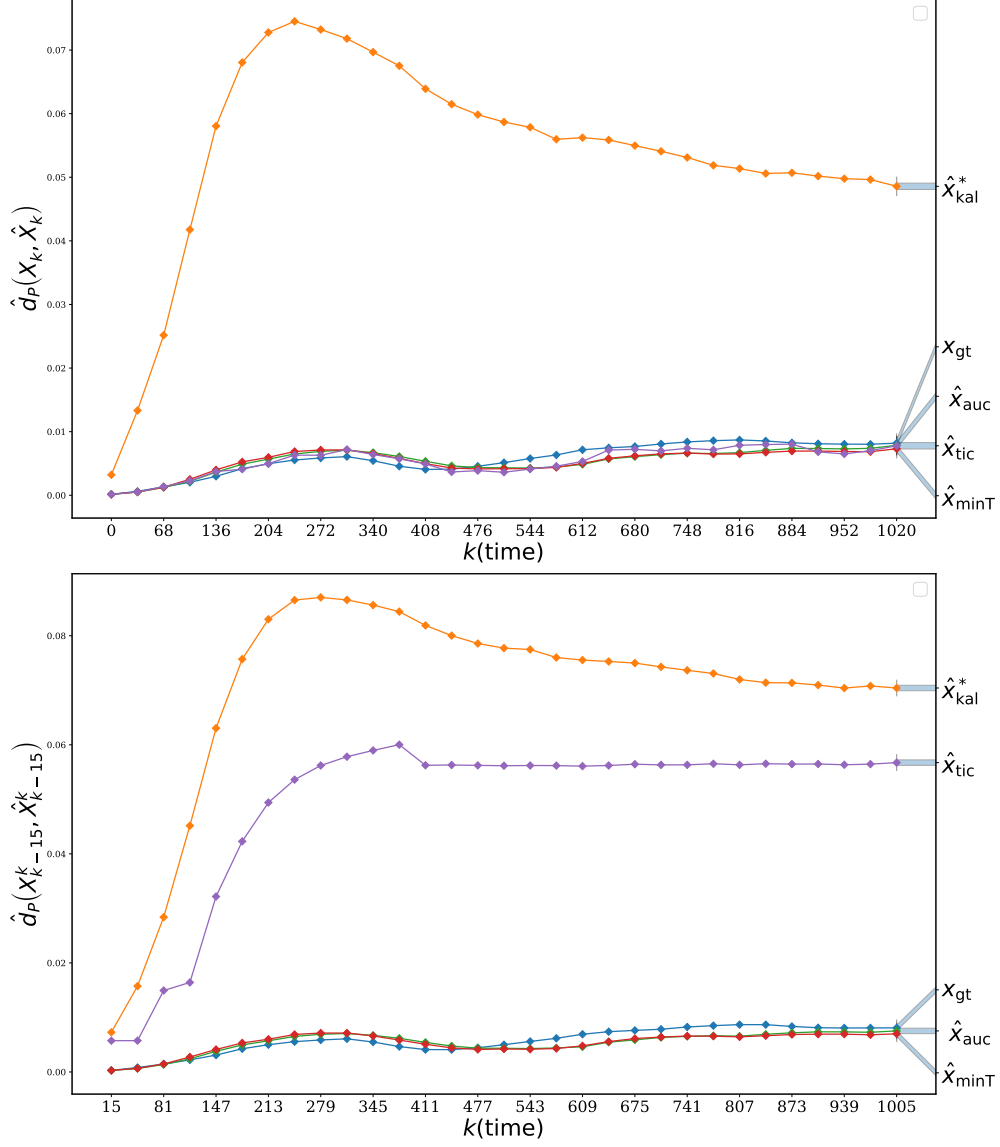

Figure 11: **Perceptual quality measured by estimated Wasserstein distance  $\hat{d}_P$  (lower is better).** **(top)** Distance between distributions of single samples  $p_{x_k}$  and  $p_{\hat{x}_k}$ . **(bottom)** Distance between distributions of 16-state vectors (at times  $[k - 15, k]$ ),  $p_{X_{k-15}^k}$  and  $p_{\hat{X}_{k-15}^k}$ . Observe that  $\hat{x}_{tic}$  single samples are distributed similarly to the ground-truth signal, but they fail to attain the reference joint distribution between timesteps. PKF outputs  $\hat{x}_{auc}$  and  $\hat{x}_{minT}$  attain high measured quality in both cases.

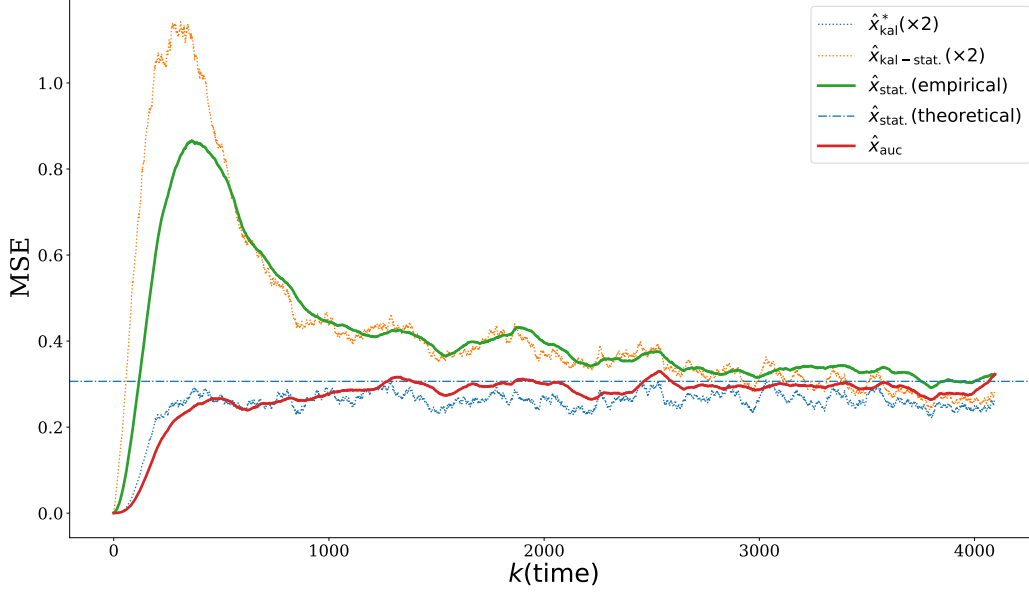

Figure 12: **MSE distortion on Coupled inverted pendulums for stationary filters.**

The state vector with the given dynamics creates frames of a wavy lake in the video domain<sup>3</sup>, through an affine transformation,

$$x_k^{vid} = W_{FA \rightarrow vid} (x_k^{FA} + \varepsilon^{FA}). \quad (145)$$

$W_{FA \rightarrow vid}$  is a linear transformation from  $\mathbb{R}^{128}$  latent states to  $\mathbb{R}^{512 \times 512 \times 3}$  frames, and  $\varepsilon^{FA}$  is a constant vector.  $A^{FA}$  and the noise  $q_k$  parameters are estimated similarly to [5]. Linear observations  $y_k \in \mathbb{R}^{32 \times 32}$  are given in the frame (pixel) domain, by

$$y_k = C_k x_k^{FA} + r_k. \quad (146)$$

At times where information is being observed,

$$C_k = C_{\times 16} W_{RGB \rightarrow y} W_{FA \rightarrow vid}, \quad (147)$$

where  $W_{RGB \rightarrow y}$  is a projection onto the Y-channel (grayscale) and  $C_{\times 16}$  is a matrix that performs  $16 \times$  downsampling in both axes. At times where there is no observed information,  $C_k = 0$ . Here,  $r_k$  is a Gaussian noise.

In our first experiment, measurements are supplied as in (147) up to frame  $k = 127$  and then vanish ( $C_k = 0, k \geq 128$ ), letting the different filters predict the next, unobserved, frames of the sequence. We pass  $y_k$  as an input to the various filters (see Table 3);  $\hat{x}_{kal}^*$  is the Kalman filter output.  $\hat{x}_{tic}$  is the perceptual filter in the spatial domain, given in (10).  $\hat{x}_{auc}$  is our Algorithm (PKF) output reducing the total cost in the latent space,  $\mathcal{C}_{auc} = \sum_{k=0}^T \mathbb{E} [\|x_k^{FA} - \hat{x}_k\|^2]$ . All filtering is done in the latent domain, and then transformed to the pixel domain. MSE is also calculated in the FA domain. In (Fig. 13) we can see that until frame  $k = 127$ , all filters reconstruct the reference frames well. Starting at time  $k = 128$ , when measurements disappear, we observe that the Kalman filter slowly fades into a static, blurry output which is the average frame value in this setting. This is definitely a non-‘realistic’ video; Neither the individual frames nor the static behavior are natural to the domain. Our perfect-perceptual filter,  $\hat{x}_{auc}$ , keeps generating a ‘natural’ video, both spatially and temporally. This makes its MSE grow faster.

We now perform a second experiment, where  $C_k$  is set to zero until frame  $k = 512$ . At times  $k \geq 513$  measurements are given again by the noisy, downsampled frames as described in (146)-(147). In Fig. 14 we present the outcomes of the different filters. We first observe that up to frame  $k = 512$ , there is no observed information, hence outputs are actually being generated according to priors.

<sup>3</sup>Original frames are taken from ‘river-14205’ by OjasweinGuptaOJG via pixabay.com, and are free to use under the content licence.

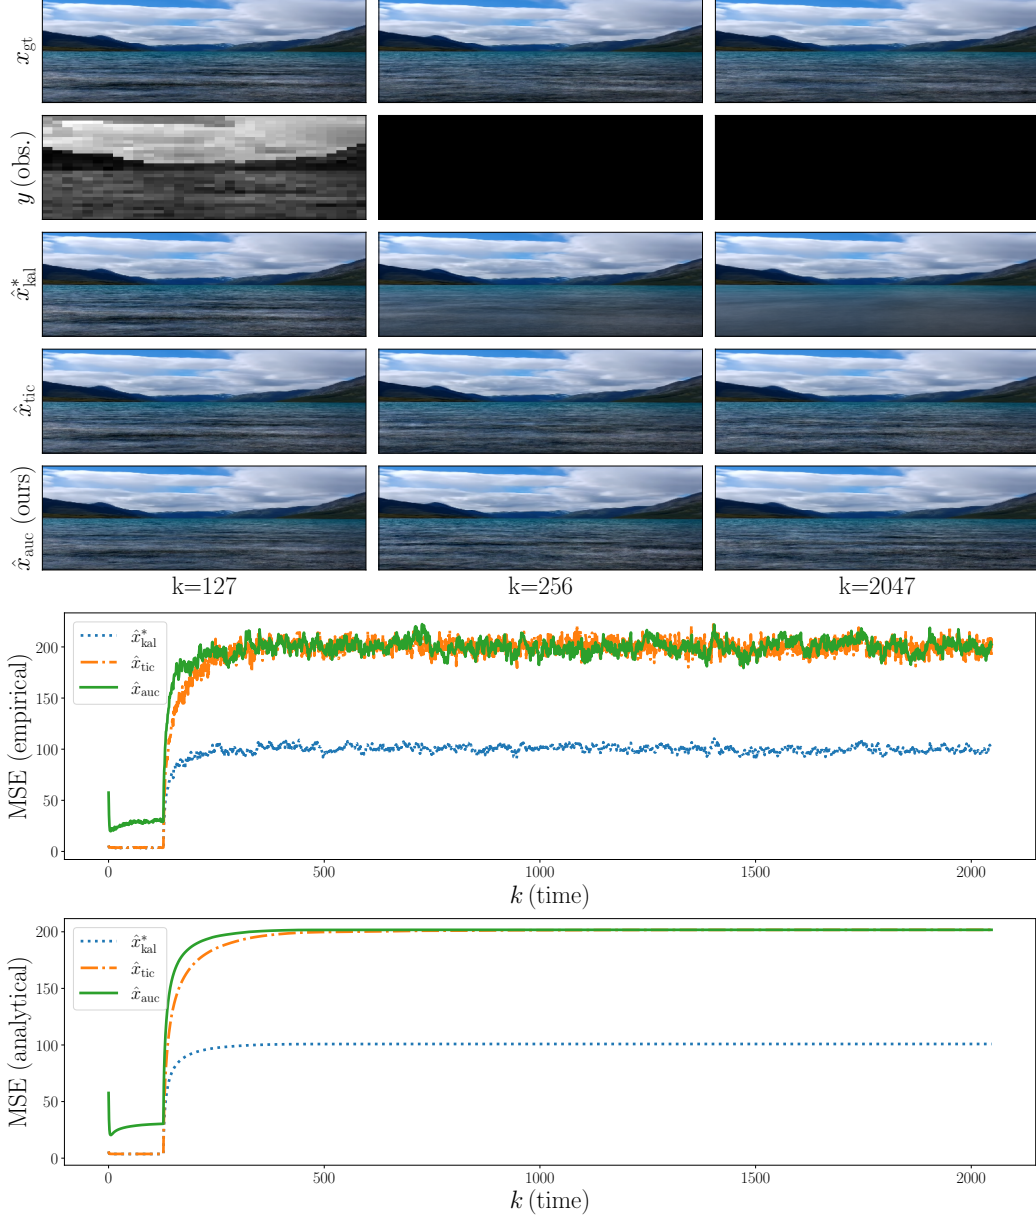

Figure 13: **Frame prediction on a dynamic texture domain.** In this experiment, measurements are supplied only up to frame  $k = 127$ . The filter’s task here is to predict the unobserved future frames of the sequence. Observe that the  $\hat{x}_{kal}^*$  fades into a blurred average frame, while the perceptual filter  $\hat{x}_{auc}$  generates a natural video, both spatially and temporally. This makes its MSE grow faster,

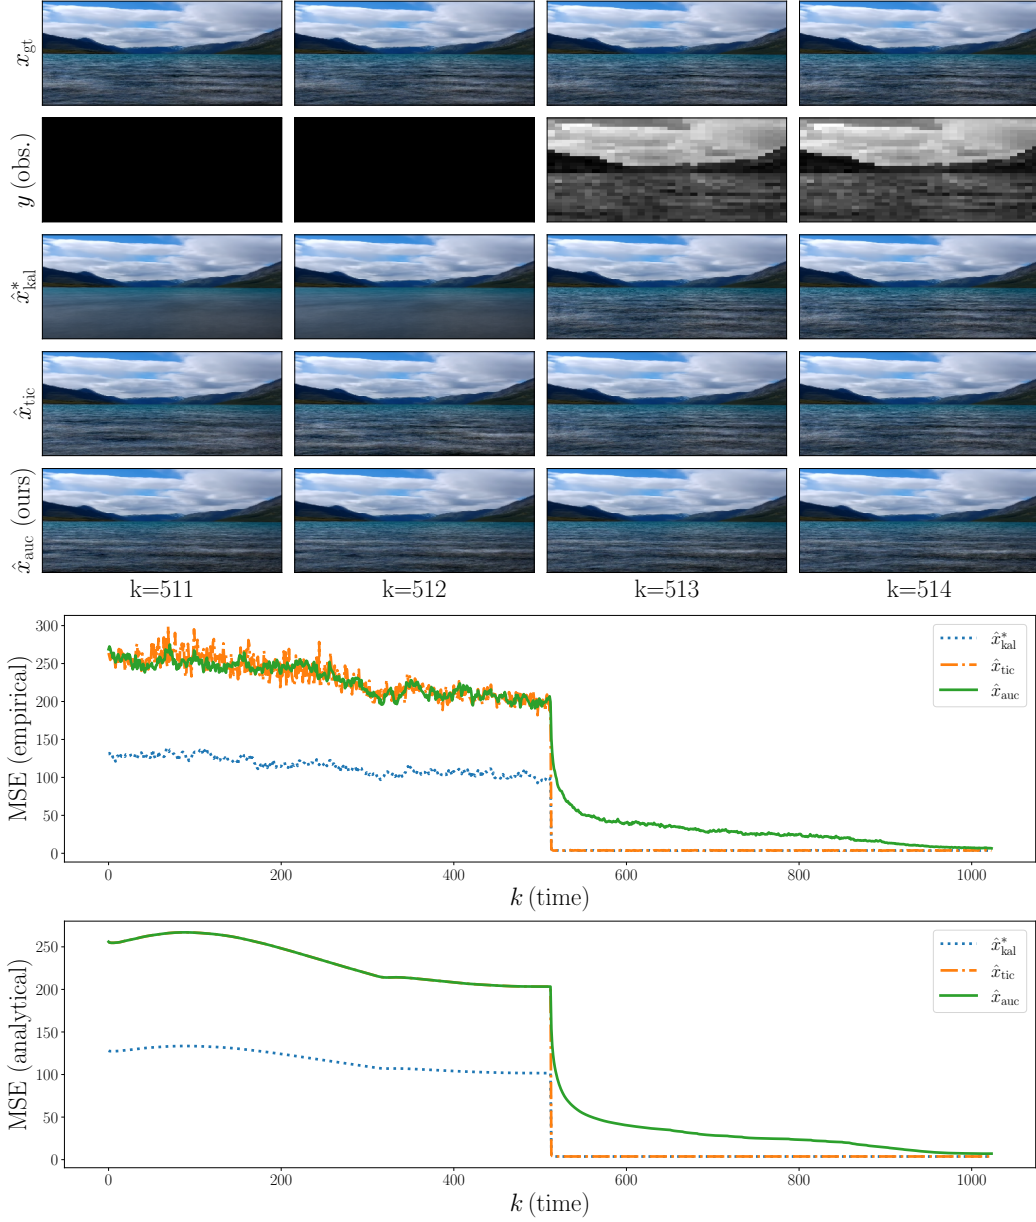

Figure 14: **Frame generation on Dynamic texture domain.** In the first half of the demo ( $k \leq 512$ ), there are no observations, hence the reference signal is restored according to prior distribution. We observe that filters with no perfect-perceptual quality constraint in the temporal domain generate non-realistic frames (Kalman filter output  $\hat{x}_{\text{kal}}^*$ ) or unnatural motion ( $\hat{x}_{\text{tic}}$ ). Perceptual filter  $\hat{x}_{\text{auc}}$  is constrained by previously generated frames and the natural dynamics of the domain, hence its MSE decays slower.

The Kalman filter outputs a static, average frame.  $\hat{x}_{\text{tic}}$  randomizes each frame independently, which creates the impression of rapid, random movement with flickering features, which is unnatural to the reference domain. At frame  $k = 513$ , when observations become available, we can see that  $\hat{x}_{\text{kal}}^*$  and  $\hat{x}_{\text{tic}}$  are being updated immediately, creating an inconsistent, non-smooth motion between frames 512 and 513. PKF output  $\hat{x}_{\text{auc}}$ , on the other hand, keeps maintaining a smooth motion. Since non-consistent filters outputs rapidly becomes similar to the ground-truth, their errors drop. The perfect-perceptual filter,  $\hat{x}_{\text{auc}}$ , remains consistent with its previously generated frames and the natural dynamics of the model, hence its error decays more slowly.
